# Supplementary material for: Rapid microwave assisted synthesis of nearly monodisperse aqueous CuInS2/ZnS nanocrystals
Source: Royal Society of Chemistry journal article supplement (doi:10.1039/c5ce01325a), 2015-01-01
Supplement: c5ce01325a1.pdf [file c5ce01325a1.pdf]

## Electronic Supplementary Information

### Rapid microwave assisted synthesis of nearly monodisperse aqueous CuInS<sub>2</sub>/ZnS nanocrystals

Yatin J. Mange,<sup>a</sup> Melissa R. Dewi,<sup>a</sup> Thomas J. Macdonald,<sup>ab</sup> William M. Skinner<sup>a</sup> and Thomas Nann<sup>ac\*</sup>

<sup>a</sup> Ian Wark Research Institute, University of South Australia, Mawson Lakes, 5095 SA, Australia, E-mail:

<sup>b</sup> Department of Chemistry, University College London, London, United Kingdom

<sup>c</sup> MacDiarmid Institute of Advanced Materials and Nanotechnology, School of Chemical and Physical Sciences, Victoria

University of Wellington, Wellington, New Zealand

Corresponding e-mail: [thomas.nann@vuw.ac.nz](mailto:thomas.nann@vuw.ac.nz)

#### Materials:

The following chemicals were purchased and used as received without further purification. Indium(III) chloride (InCl<sub>3</sub>) 98%, copper (I) acetate (Cu(Ac)<sub>2</sub>) 98%, thioglycolic acid (TGA) 98%, sodium sulfide (Na<sub>2</sub>S) 98%, zinc acetate (Zn(Ac)<sub>2</sub>) 99%, were all purchased from Sigma-Aldrich. TiO<sub>2</sub> P25 nanoparticles was supplied by EVONIK (Degussa) Industries. 1.5 cm × 1.5 cm ITO coated glass electrodes were supplied by Prazisions Glass & Optik GmbH.

#### TiO<sub>2</sub> Paste formation:

2 mL of DI water and 50 µL of acetic acid was taken in a mortar and pestle. To this 2g of TiO<sub>2</sub> particles (P25, Degussa) was added and crushed to form a smooth paste. Following this 50 µL of triton x-100 was added as a surfactant to prevent any aggregation of particles suspended in the paste.

#### Instrumentation:

Photoluminescence spectroscopy and quantum yield measurements were carried out on an Edinburgh Instruments Fluorometer FLS980. XPS measurements were undertaken using monochromatised Al Kα X-rays (300 W) in a Kratos Axis-Ultra spectrometer (10 eV analyzer pass energy). The analysis spot size was ~300 × 700 µm. UV-Visible spectroscopy measurements were carried out on an Agilent Cary 300 spectrometer. Transmission electron microscopy was carried out on a JEOL JEM-2100F with an acceleration voltage of 200 kV. Dynamic Light Scattering (DLS) measurement was carried out at 25 °C by using a Zetasizer-Nano instrument from Malvern, UK. X-ray diffraction was carried out using a Scintag ARL X'tra diffractometer and Cu Kα radiation.

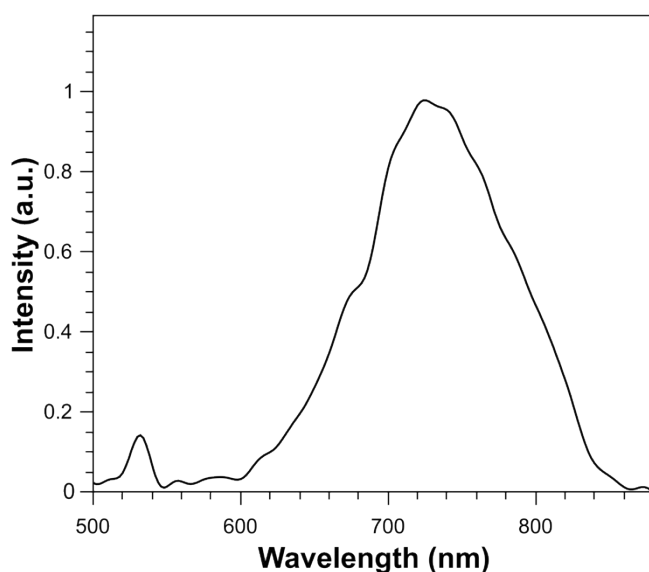

Fig. S1. Emission spectra of CuInS<sub>2</sub>-Core

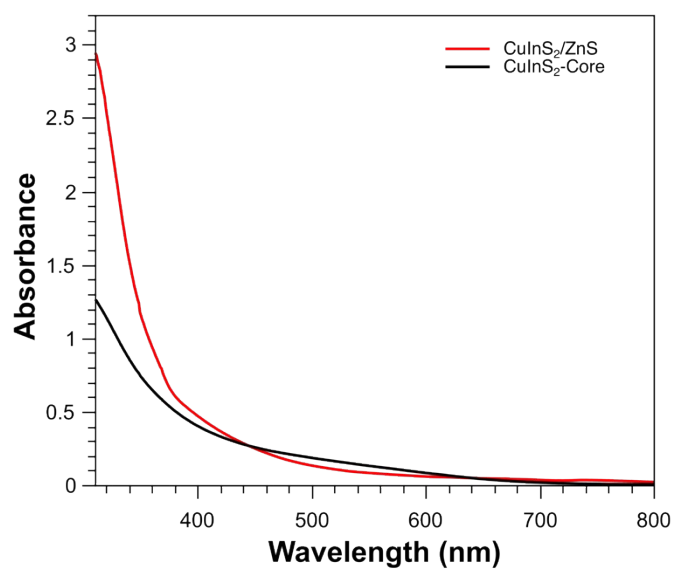

Fig. S2. Absorption spectra of CuInS<sub>2</sub>-Core (black) and CuInS<sub>2</sub>/ZnS NCs (red)

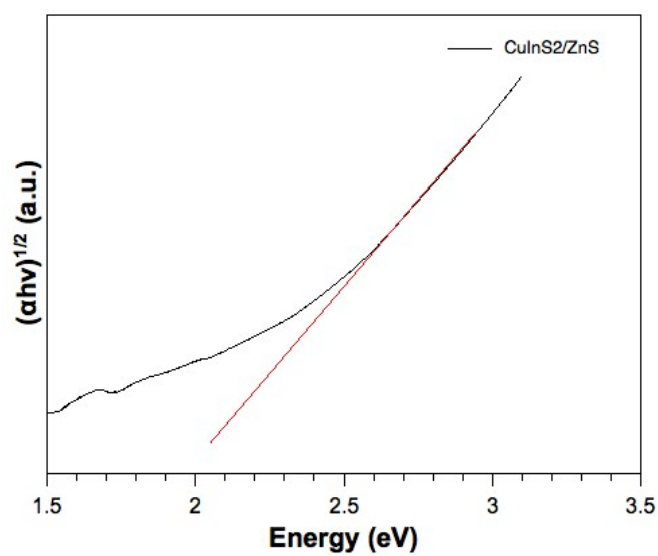

Fig. S3. Tauc plot for band gap estimation of CuInS<sub>2</sub>/ZnS NCs

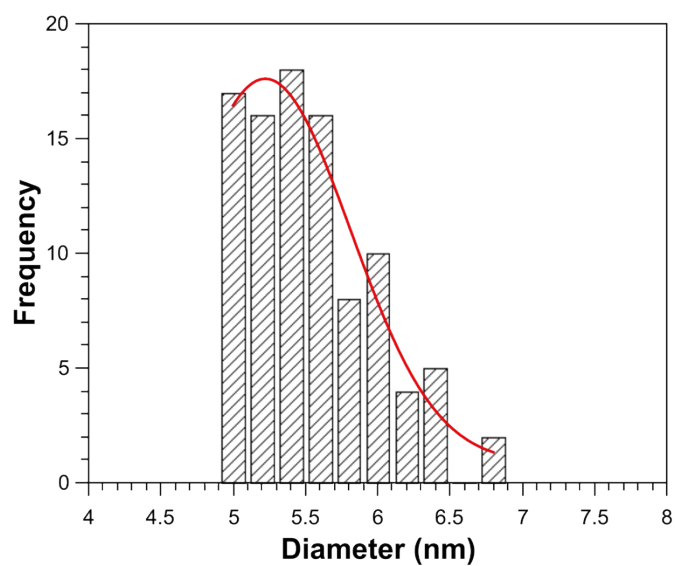

Fig. S4. Particle size distribution histogram of CuInS<sub>2</sub>/ZnS NCs obtained from TEM micrographs.

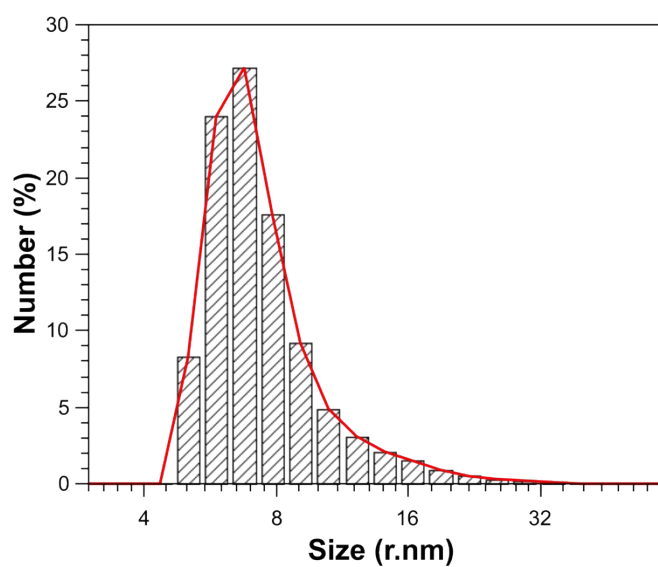

Fig. S5. DLS in r.nm for CuInS<sub>2</sub>/ZnS NCs

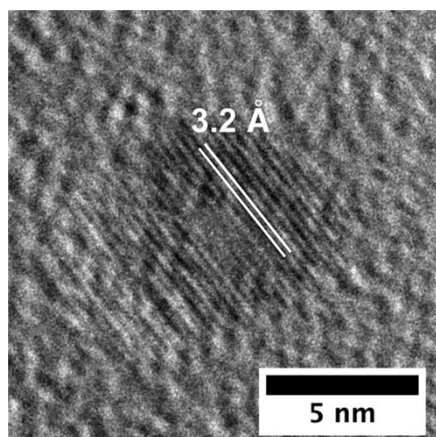

Fig S6. 5 nm CuInS<sub>2</sub>/ZnS NC showing the lattice fringes
